# Supplementary material for: MaxEnt’s parameter configuration and small samples: are we paying attention to recommendations? A systematic review
Source: PeerJ. 2017 Mar 14;5:e3093. doi: 10.7717/peerj.3093 (PMC5354112; doi:10.7717/peerj.3093)
Supplement: Supplemental Information 2 — Information on the journals, sample size, parameters used for modelling and information of geographical coordinates are provided. [file peerj-05-3093-s002.xlsx]

## Sheet: Sheet1
Authors	Journal	Volume	Issue	Pages	Samples	Features	Regularization multiplier	Coordinates
Aguirre-Gutiérrez et al, 2013	PLOS ONE	8	5	e63708	6 - 2094	Default	Default	Yes
AndriamaYesmanana and Cameron, 2013	Ecology and Evolution	3	4	763–769	7-25	Default	Default	No
Aragon et al, 2013	Journal of Applied Entomology	137	8	610-623	83-150	No info	No info	Yes
Bernardes et al, 2013	Journal of Natural History	47	17-18	1161-1175	18	No info	No info	Yes
Brambilla et al, 2013	Bird Conservation International	23	4	502-511	23 and 109	User defined	No info	No
Byers et al, 2013	PLOS ONE	8	2	e56812	82	No info	User defined	Yes
Campos and Jack, 2013	International Journal of Primatology	34	5	899-916	19	No info	Default	Yes
Castaneda-Gaytan et al, 2013	Acta Zoológica Mexicana	29	1	240-244	21	No info	No info	Yes
Castilla et al, 2013	Mastozoología neotropical	20	2	243-254	5-47	No info	No info	Yes
Chunco et al, 2013	PLOS ONE	8	3	e59853	9	No info	User defined	Yes
Cilliers et al, 2013	Ostrich: Journal of African Ornithology	84	2	101-111	39	No info	No info	Yes
Cottee-jones et al, 2013	Forktail	29		88-93	11	No info	No info	Yes
Coudrat and Nekaris, 2013	Animals	3	1	45-62	14-48	Default	Default	Yes
Duursma et al, 2013	PLOS ONE	8	12	e84222	36-8065	User defined	Default	No
Dyer et al, 2013	Freshwater Biology	58	6	1071-1088	17-55	Default	Default	Yes
Erikstad et al, 2013	Marine Geodesy	36	1	42421	30	Default	Default	No
Escalante et al, 2013	TIP	16	1	42507	12-2646	Default	No info	No
Filz et al, 2013	European Journal of Entomology	110	2	311-317	5-126	No info	No info	Yes
Flores-Armillas et al, 2013	Therya	4	1	377-393	11-371	User defined	No info	No
Funayama et al, 2013	Aquatic Conservation	23	2	233-245	16	No info	No info	No
Gallagher et al, 2013	Ecography	36	5	531-540	31-1580	Default	Default	No
Garcia et al, 2013	Applied Geography	44		42726	39-99	No info	No info	No
García et al, 2013	Environmental Conservation	41	1	42381	5-444	User defined	No info	Yes
Growns et al, 2013	Ecological Indicators	29		138-144	7-234	Default	Default	No
Kalle et al, 2013	PLOS ONE	8	11	e79295	22-55	Default	Default	Yes
Khanum et al, 2013	Acta Oecologica	49		23-31	26-99	No info	No info	Yes
KolaNowska, 2013	Acta Societatis Botanicorum Poloniae	82	3	225-230	36-70	No info	No info	Yes
Leach et al, 2013	Biological Conservation	159		490-500	16-741	User defined	Default	Yes
Lee et al, 2013	Journal of Biogeography	40	7	1290-1297	1–168	No info	No info	No
Maharaj and New, 2013	Biological Conservation	167		283-291	18-138	User defined	User defined	Yes
Marcer et al, 2013	Biological Conservation	166		221-230	10-72	Default	Default	No
Mbatudde et al, 2013	African Journal of Ecology	51	3	471-481	64	Default	Default	Yes
McGuire and Davis, 2013	Journal of Biogeography	40	8	1490-1500	2-8	Default	Default	Yes
Monadjem et al, 2013	Bird Conservation International	23	2	247-258	42	No info	No info	Yes
Mondal et al, 2013	Acta Theriologica	58	2	179-187	36	No info	No info	No
Morehouse et al., 2013	The Southwestern Naturalist	58	4	435-439	73	No info	No info	Yes
Moscoso et al, 2013	Forest Ecology and Management	310		652-662	51-731	No info	No info	Yes
Mweya et al, 2013	Infection ecology & epidemiology	3		21748	13	No info	No info	Yes
Nagaraju et al., 2013	PLOS ONE	8	11	e82066	56	Default	No info	Yes
Ortega-Andrade et al, 2013	PLOS ONE	8	12	e81837	7	No info	No info	No
Ortiz et al, 2013	Remote senYesng	5	4	1912-1931	15-225	User defined	No info	Yes
Palmas-Perez et al, 2013	Revista Mexicana de Biodiversidad	84	1	170-183	6-49	Default	Default	Yes
Perez-Garcia and Liria, 2013	Revista Mexicana de Biodiversidad	84	2	600-611	5-41	No info	No info	No
Pie et al, 2013	Ecological Modelling	250		165-176	75	User defined	Default	Yes
Porto et al, 2013	Diversity and Distributions	19	3	330-340	70-162	No info	No info	Yes
Romo et al, 2013	SHILAP Revista de Lepidopterología	41	162	267-286	18-1242	Default	Default	No
Roscioni et al, 2013	BiodiverYesty and Conservation	22	8	1821-1835	36 and 58	Default	Default	Yes
Rovzar et al, 2013	Pacific Conservation Biology	19	2	156-168	16	No info	No info	Yes
Sallam et al, 2013	PLOS ONE	10	3	e0122908	46	Default	Default	Yes
Santos et al, 2013	PLOS ONE	8	11	e79967	65-75	User defined	Default	No
Sheppard , 2013	Weed research	53	4	259-268	81-1741	Default	Default	Yes
Sheppard , 2013	Climate Change	117	4	919-931	81-1741	Default	Default	No
Solhjouy-Fard et al, 2013	Journal of Insect Science	13	116	42385	69-219	No info	No info	Yes
Stevens et al, 2013	BiodiverYesty and Conservation	22	8	1755-1767	19-314	Default	Default	Yes
Tarrant and Armstrong, 2013	Journal for Nature Conservation	21	5	369-381	18	Default	Default	Yes
Tijana et al, 2013	Archives of Biological Sciences	65	3	1037-1052	27-220	Default	Default	No
Trisurat et al, 2013	Oryx	47	3	441-450	27-457	No info	No info	Yes
Vedel-Sorensen et al, 2013	Forest Ecology and Management	307		284-292	26-1776	Default	Default	Yes
Velasquez-Tibata et al, 2013	Regional environmental change	13	2	235-248	5-86	User defined	Default	No
VorYesNo et al, 2013	PLOS ONE	8	1	e51885	19	No info	Default	Yes
Wood et al, 2013	PLOS ONE	8	9	e75160	20-89	Default	Default	Yes
Wulff et al, 2013	PLOS ONE	8	9	e73371	86-516	Default	Default	No
Yang et al, 2013	Ecological Engineering	51		83-87	46	User defined	User defined	Yes
Yesders et al, 2013	PLOS ONE	8	12	e82074	19-110	User defined	User defined	Yes
Yu et al, 2013	Annales Botanici Fennici	50	42371	35-42	76	Default	Default	Yes
Acosta, 2014	Zootaxa	3821	3	301-320	71	Default	Default	Yes
Albanese et al, 2014	Ecology of Freshwater Fish	23		347-359	32-48	Default	Default	No
Ali et al, 2014	Journal of Forestry Research	25	1	211-214	23	No info	No info	Yes
Amici et al, 2014	Applied Ecology and Environmental Research	12	3	645-659	13 and 34	No info	No info	No
Araújo et al, 2014	Journal of Biogeography	41		513-523	13-528	Default	Default	No
Beaumont et al, 2014	Diversity and Distributions	20		613-625	24-462	User defined	Default	Yes
Behdarvand et al, 2014	Biological Conservation	177		156-164	31 and 57	Default	Default	Yes
Boria et al, 2014	Ecological Modelling	275		73-77	88	User defined	Default	Yes
Burneo, 2014	Therya	5	1	197-228	5-786	No info	No info	No
Chetan et al, 2014	PLOS ONE	9	2	e87804	11 and 45	Default	Default	Yes
Chitale et al, 2014	PLOS ONE	9	12	e115264	15	No info	No info	Yes
Chłond et al, 2014	Zoological Studies	53	1	8	42-90	Default	Default	Yes
Clément et al, 2014	Tropical Conservation Science	7	2	192-213	63-358	User defined	No info	No
Costa et al, 2014	Parasites & Vectors	7		238	35-332	Default	Default	Yes
Cruz-Cárdenas et al, 2014	Revista Mexicana de Biodiversidad	85		189-199	10-142	Default	Default	No
Cruz-Cárdenas, 2014	Revista Chapingo Serie Ciencias Forestales y del Ambiente	20	2	188-201	28-159	Default	Default	Yes
Da Yeslva Pinto et al, 2014	Ciência Florestal	24	3	597-607	80	Default	User defined	Yes
Dai et al, 2014	Applied Mechanics and Materials	651-653		1496-1503	27	No info	No info	No
De Castro Pena et al, 2014	Biological Conservation	170		130-136	16	Default	Default	Yes
de Novaes e Yeslva et al, 2014	Biological Conservation	180		42379	1-59	No info	No info	No
de Oliveira Moreira et al, 2014	PLOS ONE	9	10	e110929	42	Default	Default	Yes
Delgadillo et al, 2014	Revista Mexicana de Biodiversidad	85		84-97	5	Default	Default	No
Dicko et al, 2014	PNAS	111	28	10149-10154	56	User defined	No info	Yes
Douglas et al, 2014	Journal of Mammalogy	95	4	803-813	36	Default	Default	Yes
Engler et al, 2014	Journal of Ornithology	155	3	657-669	50	No info	No info	Yes
Estay et al, 2014	PLOS ONE	9	7	e102592	25-49	No info	No info	Yes
Ficetola et al, 2014	International Journal of Geographical Information Science	28	8	1723-1739	26-156	User defined	Default	Yes
Forero-Medina et al, 2014	Acta Biologica Colombiana	19	3	415-426	6	No info	No info	Yes
Frick et al, 2014	Environmental Management	53		728-738	89	No info	User defined	Yes
GaliaNo et al, 2014	PLOS ONE	9	5	e97301	29-45	Default	Default	Yes
Giles et al, 2014	Parasites & Vectors	7	1	189	63-314	No info	No info	Yes
Giovannini et al, 2014	BiodiverYesty and Conservation	23		1427-1439	15	Default	No info	Yes
Gonçalves Morato et al, 2014	PLOS ONE	9	4	e92950	62	Default	No info	Yes
González et al, 2014	Acta Tropica	129		83-90	23-39	Default	Default	Yes
Groff et al, 2014	Herpetological Conservation and Biology	9	2	354-368	17	User defined	Default	Yes
Guida et al, 2014	The Profesional Geographer	66	2	311-322	12-55	Default	Default	Yes
Harbert et al, 2014	American Journal of Botany	101	4	710-721	11-138	Default	Default	Yes
Hu et al, 2014	PLOS ONE	9	1	e84529	36	Default	Default	Yes
Isaac et al, 2014	Austral ecology	39	8	963-972	51-150	No info	User defined	No
Jarnevich et al, 2014	Invasive plant Science and Management	7	3	491-502	7-1024	Default	No info	Yes
Jiang et al, 2014	Ecological Indicators	38		72-80	80	Default	Default	Yes
Jiménez-Alfaro et al, 2014	Journal of Vegetation Science	25	6	1394-1404	15	No info	No info	No
Kumar et al, 2014	Computers and Electronics in Agriculture	103		55-62	53	User defined	User defined	Yes
Lei et al , 2014	Polish Journal of Ecology	62		771-787	40	Default	Default	Yes
Lessman et al, 2014	Ecology and Evolution	4	12	2410-2422	5	No info	No info	No
Li et al, 2014	Conservation Biology	28	1	87-94	86	Default	Default	No
Lopes et al., 2014	Papéis Avulsos de Zoologia	54	19	293-298	30 and 37	No info	No info	Yes
Lötter er al, 2014	Ecology and Evolution	4	8	1209-1221	71-101	User defined	No info	Yes
Lyu et al, 2014	Wildlife Biology	20	2	73-82	41	No info	No info	Yes
Maguranyanga et al, 2014	Canadian Journal of Remote Sensing	40		396-405	15-71	No info	No info	No
Manrique et al, 2014	Biocontrol Science and TechNology	24	5	518-535	42536	No info	No info	No
Mantilla-Meluk et al, 2014	Zootaxa	3793	1	060-070	18-21	No info	No info	Yes
MaYesn et al, 2014	Biological Invasions	16		217-231	32-532	User defined	User defined	No
Meißner et al, 2014	Journal of Sea Research	85		241-254	34-201	Default	Default	Yes
Meneses et al, 2014	Ecología en Bolivia	49	1	3 a 19	9	No info	No info	No
Merow et al, 2014	Methods in Ecology and Evolution	5		215-225	50-500	User defined	No info	Yes
Meyer et al, 2014	American Journal of Primatology	76		551-562	14-33	Default	Default	Yes
MonteciNo et al, 2014	Aquatic invasions	9	4	507-519	55-225	Default	Default	Yes
Norris, 2014	Tropical Conservation Science	7	3	529-547	39-80	User defined	User defined	Yes
Orr et al, 2014	Zootaxa	3846	3	411-429	54 and 372	Default	Default	Yes
Pedersen et al, 2014	Geospatial Health	8	2	335-343	11-121	No info	No info	Yes
Plasencia-Vazquez et al, 2014	Acta Zoológica Mexicana	30	3	471-490	9-147	Default	Default	No
Polce et al, 2014	Global Change Biology	20		2815-2828	26-2096	User defined	No info	No
Ramirez-Villegas et al, 2014	Journal for Nature Conservation	22	5	391-404	<40	No info	No info	Yes
Roscioni et al, 2014	Landscape Ecology	29		891-903	47	Default	Default	Yes
Samy et al, 2014	Revista da Sociedade de Medicina Tropical	47	1	57-62	26-169	No info	No info	Yes
Santos et al, 2014	Biological Journal of the Linnean Society	112		150-162	27-216	Default	User defined	Yes
Saupe et al, 2014	Journal of Biogeography	41		1352-1366	15-47	User defined	Default	Yes
Shrestha and Bawa, 2014	PLOS ONE	9	9	e106405	37	Default	Default	Yes
Stachura-Skierczynńska, 2014	Annual Zoology Fennici	51		349-370	49, 129 and 142	No info	No info	No
Syfert et al, 2014	Biological Conservation	177		174-184	54-246	User defined	Default	Yes
Tererai et al, 2014	South African Journal of Botany	95		152-158	49-971	User defined	No info	Yes
Trisurat et al, 2014	Wildlife Research	41		522-536	43-930	No info	No info	Yes
Valera et al, 2014	Ecosistemas	23	1	46-53	25-250	No info	No info	No
Van Gils et al, 2014	Journal for Nature Conservation	22		23-34	64	Default	Default	No
Vazquez et al, 2014	Revista de biologia tropical	62	4	1509-1522	8-286	No info	No info	No
Verovnik et al, 2014	Journal of Insect Conservation	18		675-682	18 or 21	No info	No info	Yes
Wan et al, 2014	BiodiverYesty and Conservation	23		1395-1409	6-48	Default	Default	No
Warren et al, 2014	Diversity and Distributions	20		334-343	48	Default	User defined	No
Wieczorek et al, 2014	Agricultural and Forest Entomology	16	4	434-443	38-113	No info	No info	Yes
Worthington et al, 2014	Global Change Biology	20		89-102	47-163	Default	Default	No
Xu et al, 2014	Chin.Geogra.Sci	24	1	60-70	70-273	No info	No info	No
Yesllero et al, 2014	International Journal of Geographical Information Science	28	8	1709-1722	15-97	Default	No info	Yes
Yeslva et al, 2014	Tropical Conservation Science	7	1	61-74	10-40	No info	No info	Yes
Yeslva et al, 2014	Ecological Modelling	273		200-209	48-66	No info	No info	Yes
Yesmó et al, 2014	Zoological Studies	53	1	50	65-129	No info	No info	Yes
Yohe et al, 2014	Tropical Conservation Science	7	3	586-596	45-287	Default	Default	No
York et al, 2014	PLOS ONE	9	8	e103831	86	No info	No info	Yes
Yu et al, 2014	Forest Ecology and Management	327		48-54	30 and 227	Default	Default	No
Zank et al, 2014	PLOS ONE	9	4	e94625	5-68	Default	Default	Yes
Zhang et al, 2014	Chinese Science Bulletin	59	34	4652-4659	5-10	User defined	No info	No
Zhang et al, 2014	Diversity and Distributions	20		405-415	5	User defined	No info	Yes
Aguiar et al, 2015	Austral ecology	40	7	836-844	58	Default	Default	Yes
Aguilar-Soto, 2015	Forests	6	3	692-707	38	Default	Default	Yes
Akasaka et al, 2015	Urban Ecosystems	18	3	1021-1030	32	No info	No info	Yes
Alamgir et al, 2015	Applied Geography	60	Yes	42662	13-15	No info	No info	Yes
Alfaro-Saiz et al, 2015	Plant Biosystems	149	5	827-837	5-43	Default	Default	Yes
Ali et al, 2015	Journal of animal and plant sciences	25	3	319-323	32	No info	No info	Yes
Alimi et al, 2015	Parasites & Vectors	8		431	62-271	No info	No info	No
Almalki et al, 2015	Applied Ecology and Environmental Research	13	1	67-84	14-766	No info	No info	No
Amici et al, 2015	Landscape Research	40	2	208-225	30	No info	No info	No
Banag et al, 2015	Plant Ecology	216	9	1325-1340	20-120	User defined	Default	Yes
Bleyhl et al, 2015	Biological Conservation	191		83-92	46-195	User defined	Default	Yes
Botello et al, 2015	Revista Mexicana de Biodiversidad	86	1	226-237	12-457	Default	Default	No
Botero-Delgadillo et al, 2015	Bird Conservation International	25	4	451-465	25	User defined	User defined	Yes
Bouchet et al, 2015	Ecosphere	6	8	137	84	User defined	User defined	Yes
Brambilla et al, 2015	European Journal of Wildlife Research	61	1	35-44	33-39	User defined	No info	Yes
Breiner et al, 2015	Methods in Ecology and Evolution	6	10	1210-1218	10	User defined	Default	No
Carlos-Junior et al, 2015	Ecology and Evolution	5	11	2162-2171	11-57	No info	No info	Yes
Carvalho et al, 2015	BaYesc and Applied Ecology	16	5	413-419	64	No info	No info	Yes
Carvalho et al, 2015	Journal of Insect Conservation	19	3	581-587	7-103	User defined	Default	Yes
Chlond et al, 2015	Entomological Science	18	3	389-399	30-58	No info	User defined	Yes
Chłond et al, 2015	Zoological Studies	54	9		50	No info	Default	Yes
Conflitti et al, 2015	Biological Journal of the Linnean Society	115	1	13-27	30-76	Default	Default	Yes
Coro et al, 2015	Ecological Modelling	305		29-39	12	No info	No info	Yes
Costa et al, 2015	Chelonian Conservation and Biology	14	1	88-94	36	No info	No info	Yes
Cuevas-Yanez et al, 2015	Insect Conservation and Diversity	8	6	517-524	13-48	Default	Default	Yes
Cuyckens et al, 2015	Oryx	49	4	611-618	86	No info	No info	Yes
Cuyckens et al, 2015	Journal of Arid Environments	115		14-18	39-90	No info	No info	Yes
De Almeida et al, 2015	Memorias do Instituto Oswaldo Cruz	110	4	551	21-143	Default	Default	Yes
De Marco et al, 2015	Freswater science	34	3	1123-1132	10	User defined	No info	Yes
do Amaral et al, 2015	Journal of experimental marine biology and ecology	472		166-179	6-52	Default	Default	Yes
Dunn et al, 2015	Bird Conservation International	25	4	466-478	34	User defined	User defined	Yes
Dzerefos et al, 2015	Entomologia Experimentalis et Aplicata	156	1	42382	36	No info	No info	Yes
Flo et al, 2015	Bulletin OEPP	45	2	259-268	50	No info	No info	No
Fois et al, 2015	Journal for Nature Conservation	24		42-48	8	Default	Default	Yes
Fraser et al, 2015	International journal of Geo-information	4	2	725-740	7	No info	No info	Yes
García-Roselló et al, 2015	Global Ecology and Biogeography	24	3	335-347	1-10000	Default	Default	No
Geary et al, 2015	Records of the Australian Museum	67	6	163-183	26	Default	Default	Yes
Geary et al, 2015	Population Ecology	57	2	421-431	56-71	Default	Default	Yes
Gelviz-Gelvez et al, 2015	Ecological Engineering	74		302–309	40-200	No info	No info	No
Gelviz-Gelveza et al, 2015	Ecological Engineering	74		302–309	40-200	No info	No info	No
Gonzalez-Irusta et al, 2015	Hydrobiologia	745	1	43-57	13-26	No info	No info	Yes
Hanafi-Bojd et al, 2015	ZooNoses and public health	62	8	644-654	25	No info	No info	Yes
Hoffman, 2015	American Midland Naturalist	173	2	253-266	44-56	User defined	No info	Yes
Hoffmann et al, 2015	Biotropica	15	2	12	41	No info	No info	No
Holzmann et al, 2015	International Journal of Primatology	36	1	18-32	7-11	Default	Default	Yes
Hu et al, 2015	Journal of Insect Science	15	1	148	77	No info	No info	Yes
Jaime et al, 2015	Journal of plant ecology	8	5	457-467	10-226	Default	Default	Yes
Jones et al, 2015	Ursus	26	2	97-106	25	Default	Default	Yes
jones et al, 2015	Forest Ecology and Management	358		222-229	78	No info	No info	No
Kesler et al, 2015	PLOS ONE	10	5	e0125113	28	No info	No info	Yes
Kim et al, 2015	Journal of Ecology and Environment	38	1	15-23	36	No info	No info	Yes
Koncki et al, 2015	Invasive plant Science and Management	8	4	436-450	66-844	Default	Default	Yes
Kusch et al, 2015	Insect Conservation and Diversity	8	1	92-101	12-89	No info	No info	Yes
Kwon et al, 2015	Journal of Ecology and Environment	38	4	529-536	20	No info	No info	Yes
Liminana et al, 2015	Oryx	49	2	329-337	52	No info	No info	No
Lucifora et al, 2015	Current Zoology	61	5	811-826	44	No info	No info	Yes
Luo et al, 2015	Ecological Applications	25	1	24-83	35-130	Default	Default	Yes
Luo et al, 2015	Ecological Applications	25	1	24-83	35-130	Default	Default	Yes
Maestri et al, 2015	PLOS ONE	10	4	e0122412	80	No info	No info	Yes
Marchan et al, 2015	Soil biology and biochemistry	81		124-127	17	No info	No info	Yes
Marshall et al, 2015	Ecology and Evolution	5	19	4426-4436	31-1862	No info	No info	Yes
Montemayor et al, 2015	Bulletin of Entomological Research	105	2	173-181	44	Default	Default	Yes
Moriguchi et al, 2015	Journal of AYesa-Pacific Entomology	18	2	343-350	12	No info	No info	Yes
Morovati et al, 2015	Applied Ecology and Environmental Research	13	3	725-739	39	No info	No info	No
Nazeri et al, 2015	Ecological Informatics	29		25-32	23-65	No info	No info	Yes
PadoNou et al, 2015	African Journal of Ecology	53	1	83-92	15-20	No info	No info	Yes
Parsa et al, 2015	Experimental and applied acarology	65	2	195-204	55-429	Default	User defined	Yes
Patrao et al, 2015	Journal of molluscan studies	81	4	427-434	21-96	Default	Default	Yes
Pekarsky et al, 2015	Diversity and Distributions	21	4	416-427	52	No info	No info	Yes
Pienaar et al, 2015	South African Journal of Science	111	42559	42-50	76	No info	No info	No
Popov, 2015	Acta zoologica Bulgarica	67	1		10-112	Default	Default	Yes
Pouteau et al, 2015	Diversity and Distributions	21	11	1329-1338	4-81	No info	Default	No
Radinger et al, 2015	Ecological Applications	25	4	914-927	15-63	Default	Default	No
Remya et al, 2015	Ecological Engineering	82		184-188	22	No info	No info	No
Romo et al, 2015	Journal of Insect Conservation	19	6	1101-1118	26-171	Default	Default	Yes
Russo et al, 2015	Journal of zoology	297	3	165-175	25-37	Default	Default	Yes
Shrestha et al, 2015	Journal of Systematics and Evolution	53	1	88-103	15-66	Default	Default	Yes
Shrestha et al, 2015	Journal of Systematics and Evolution	53	1	88-103	15-66	Default	Default	No
Suarez-Mota et al, 2015	Plant Ecology and Evolution	148	3	318-328	20-73	No info	No info	Yes
Urbani et al, 2015	Zoologischer Anzeiger	258		99-109	16-66	Default	Default	Yes
Vergara et al, 2015	Zoologia	31	6	445-456	85	Default	Default	Yes
Wang et al, 2015	Biodiversity and Conservation	24	10	2383-2397	10-183	No info	User defined	No
Yeslva et al, 2015	AoB PLANTS	7		plv066	72	Default	Default	Yes
Yousefi et al, 2015	PLOS ONE	10	9	e0138087	46	No info	No info	Yes
Yuan et al, 2015	Fungal ecology	17		140-145	15-39	No info	No info	Yes
Zeng et al, 2015	PLOS ONE	10	2	e0117307	100	No info	No info	Yes
